# Supplementary material for: Polyion complex libraries possessing naturally occurring differentiation for pattern-based protein discrimination
Source: Royal Society of Chemistry journal article supplement (doi:10.1039/c3cc45640d), 2013-01-01
Supplement: c3cc45640d.pdf [file c3cc45640d.pdf]

## ***Polyion Complex Library Possessing Naturally Occurring Differentiation for Pattern-based Protein Discrimination***

Shunsuke Tomita\* and Keitaro Yoshimoto\*

Department of Life Sciences, Graduate School of Arts and Sciences, The University of Tokyo, 3-8-1 Komaba, Muguro, Tokyo 153-8902, Japan

E-mail: s\_tomita@bio.c.u-tokyo.ac.jp; ckeitaro@mail.ecc.u-tokyo.ac.jp

### **Materials and Methods**

#### *Materials*

**Enzymes:**  $\beta$ -Galactosidase from *Aspergillus oryzae* (GALAO),  $\beta$ -galactosidase from *Escherichia coli* (GALEC),  $\alpha$ -amylase from *Aspergillus oryzae* (AMYAO), and amyloglucosidase from *Aspergillus niger* (AMYAN) were obtained from Sigma Chemical Co. (St. Louis, MO). **Substrates:** *o*-Nitrophenyl- $\beta$ -D-galactopyranoside (oNPG, for GALAO and GALEC) and *p*-nitrophenyl- $\alpha$ -D-glucofuranoside (pNPG, for AMYAN) were obtained from Sigma Chemical Co. *p*-Nitrophenyl- $\alpha$ -D-maltoside (pNPM, for AMYAO) was obtained from Calbiochem (La Jolla, CA). **Human plasma proteins:** Albumin from human serum (ALB), immunoglobulin G from human serum (IMM),  $\alpha_1$ -antitrypsin from human plasma (ANT), fibrinogen from human plasma (FIB), and apo-transferrin from human (TRA) were obtained from Sigma Chemical Co. **Others:** Poly(ethylene glycol)-*block*-poly(*N,N*-dimethylaminoethyl methacrylate) (PEG-*b*-PAMA) with average Mw (PEG) 5000 and Mw (PAMA) 12000 was obtained from Polymer Source inc. (Dorval, QC, Canada). 3-(*N*-Morpholino)propanesulfonic acid (MOPS) was obtained from Sigma Chemical Co. All chemicals used were of high-quality analytical grade and were used as received.

#### *Determination of enzyme and plasma protein concentrations*

Concentrations of enzymes and plasma proteins were determined from the absorbance at 280 nm using a spectrophotometer (UV-2450; Shimadzu Corporation, Kyoto, Japan), with extinction coefficients of 192075 M<sup>-1</sup> cm<sup>-1</sup> (GALAO), 1046760 M<sup>-1</sup> cm<sup>-1</sup> (GALEC), 106160 M<sup>-1</sup> cm<sup>-1</sup> (AMYAO), 145230 M<sup>-1</sup> cm<sup>-1</sup> (AMYAN), 34445 M<sup>-1</sup> cm<sup>-1</sup> (ALB), 203585 M<sup>-1</sup> cm<sup>-1</sup> (IMM), 19940 M<sup>-1</sup> cm<sup>-1</sup> (ANT), 654160 M<sup>-1</sup> cm<sup>-1</sup> (FIB), and 85115 M<sup>-1</sup> cm<sup>-1</sup> (TRA).<sup>[1]</sup>

### *Titration of PEG-b-PAMA to enzymes*

Various concentrations of PEG-*b*-PAMA were incubated with anionic enzymes (62.5 nM GALAO, 15 nM GALEC, 187.5 nM AMYAO, and 168.8 nM AMYAN) in 10 mM MOPS (pH 7.0). After incubation for 30 min at 25°C, 120 µL of each solution was loaded into each well of 96-well plates (Half Area 96-Well Clear Flat Bottom UV-Transparent Microplates; Corning Inc., Corning, NY). Subsequently, 30 µL of substrate solution (25 mM oNPG, 25 mM pNPM, and 45 mM pNPG) in 10 mM MOPS (pH 7.0) was added to each well containing the corresponding enzymes so that the final concentrations were 50 nM GALAO and 5 mM oNPG; 12 nM GALEC and 5 mM oNPG; 150 nM AMYAO and 5 mM pNPM; 135 nM AMYAN and 9 mM pNPG. The time course of the increase in absorbance at 400 nm was then recorded using a microplate reader (Viento<sup>®</sup> nano; DS Pharma Biomedical Co. Ltd., Osaka, Japan). The samples were measured in triplicate.

### *Titration of plasma proteins to enzyme/polyelectrolyte complexes (EPCs)*

Enzymes and PEG-*b*-PAMA were mixed in the ratio obtained by PEG-*b*-PAMA titration to enzymes to prepare EPCs in 10 mM MOPS (pH 7.0) (75 nM GALAO and 132 nM PEG-*b*-PAMA; 9 nM GALEC and 104.3 nM PEG-*b*-PAMA; 225 nM AMYAO and 162 nM PEG-*b*-PAMA; 202.5 nM AMYAN and 308.3 nM PEG-*b*-PAMA). Aliquots of 100 µL of each solution were loaded into each well of 96-well plates. Subsequently, 20 µL of various concentrations of plasma proteins was added to each well. After incubation for 30 min at 25°C, 30 µL of substrate solution (25 mM oNPG, 25 mM pNPM, and 45 mM pNPG) in 10 mM MOPS (pH 7.0) was further added to each well containing the corresponding enzymes so that the final concentrations were 50 nM GALAO, 88 nM PEG-*b*-PAMA, and 5 mM oNPG; 6 nM GALEC, 69.5 nM PEG-*b*-PAMA, and 5 mM oNPG; 150 nM AMYAO, 108 nM PEG-*b*-PAMA, and 5 mM pNPM; 135 nM AMYAN, 205.5 nM PEG-*b*-PAMA, and 9 mM pNPG. The time course of the increase in absorbance at 400 nm was then recorded using a microplate reader. The samples were measured in triplicate.

### *Sensing of plasma protein analytes*

Enzymes and PEG-*b*-PAMA were mixed at the optimal ratio determined taking into account both differences in activity changes between plasma proteins and signal-to-noise ratio in the absorbance increase (7.5 nM GALAO and 13.2 nM PEG-*b*-PAMA; 1.5 nM GALEC and 17.3 nM PEG-*b*-PAMA; 75 nM AMYAO and 54 nM PEG-*b*-PAMA; 202.5 nM AMYAN

and 308.3 nM PEG-*b*-PAMA) in 10 mM MOPS (pH 7.0). Aliquots of 100  $\mu$ L of each solution were loaded into each well of 96-well plates. Subsequently, 20  $\mu$ L of plasma protein analytes (shown in Table S1) was added. After incubation for 30 min at 25°C, 30  $\mu$ L of substrate solution (25 mM oNPG, 25 mM pNPM, and 45 mM pNPG) in 10 mM MOPS (pH 7.0) was further added to each well containing the corresponding enzymes so that the final concentrations were 5 nM GALAO, 8.8 nM PEG-*b*-PAMA, and 5 mM oNPG; 1 nM GALEC, 11.5 nM PEG-*b*-PAMA, and 5 mM oNPG; 50 nM AMYAO, 36 nM PEG-*b*-PAMA, and 5 mM pNPM; 135 nM AMYAN, 205.5 nM PEG-*b*-PAMA, and 9 mM pNPG. The time course of the increase in absorbance at 400 nm was then recorded using a microplate reader for 40 min (GALAO), 80 min (GALEC), and 120 min (AMYAO and AMYAN). This process was repeated for seven plasma protein analytes with three EPC in six replicates each, providing a data set matrix of 3 EPC  $\times$  7 analytes  $\times$  6 replicates. This data set matrix was subjected to classical linear discriminant analysis using SYSTAT 13 (Systat Inc., Evanston, IL). Similar procedures were also performed to discriminate 21 unknown plasma protein analytes.

## Figures and Tables

### Enzymes

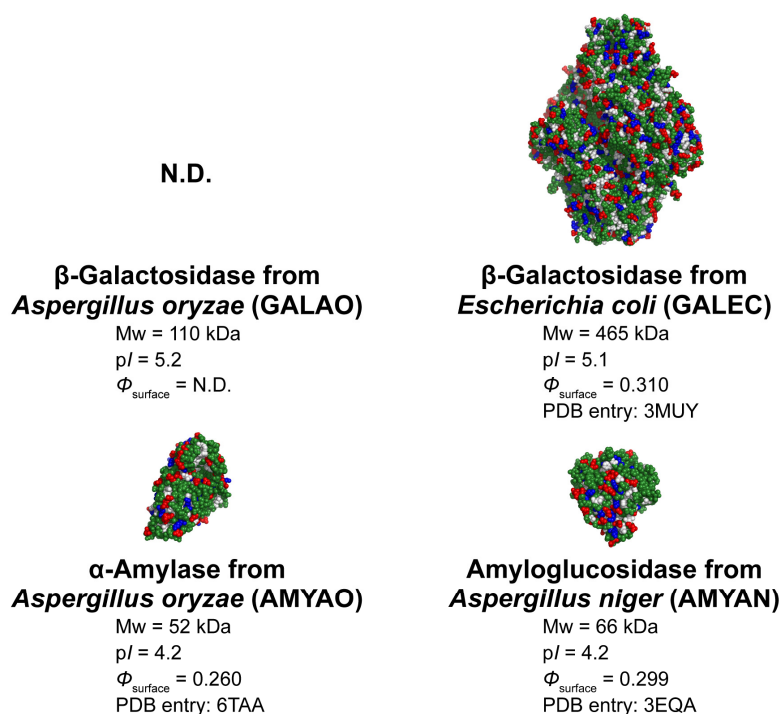

### Human plasma proteins

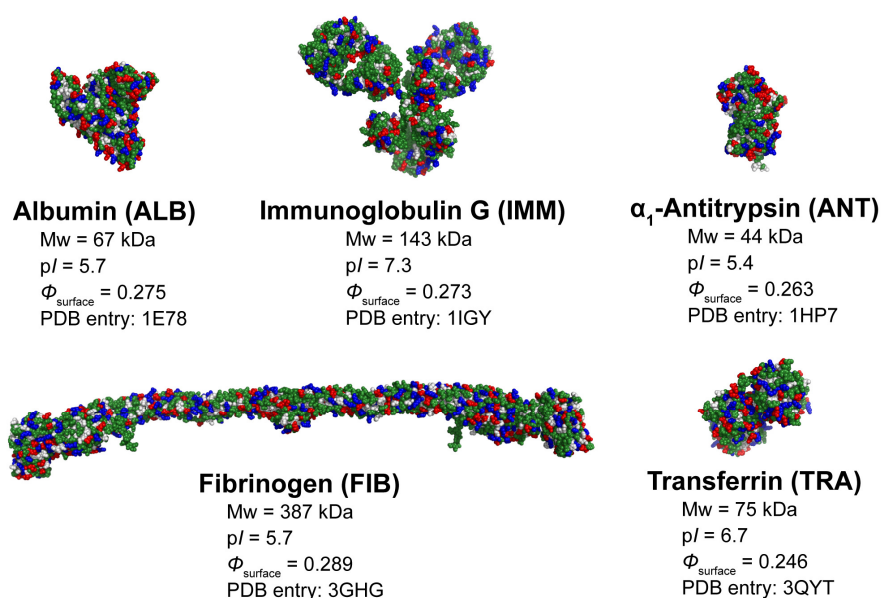

**Figure S1.** Properties of anionic enzymes and human plasma proteins. Color scheme for enzymes and proteins: anionic residues, red; cationic residues, blue; hydrophobic residues, gray; hydrophilic residues, green. The surface hydrophobicity ( $\Phi_{\text{surface}}$ ) of enzymes and proteins based on the Miyazawa-Jernigan hydrophobicity scale was estimated using the previously described method<sup>[2]</sup> with the accessible surface areas of enzymes and proteins calculated by the program GETAREA.<sup>[3]</sup> The crystal structure of GALAO is not available in the Protein Data Bank (PDB).

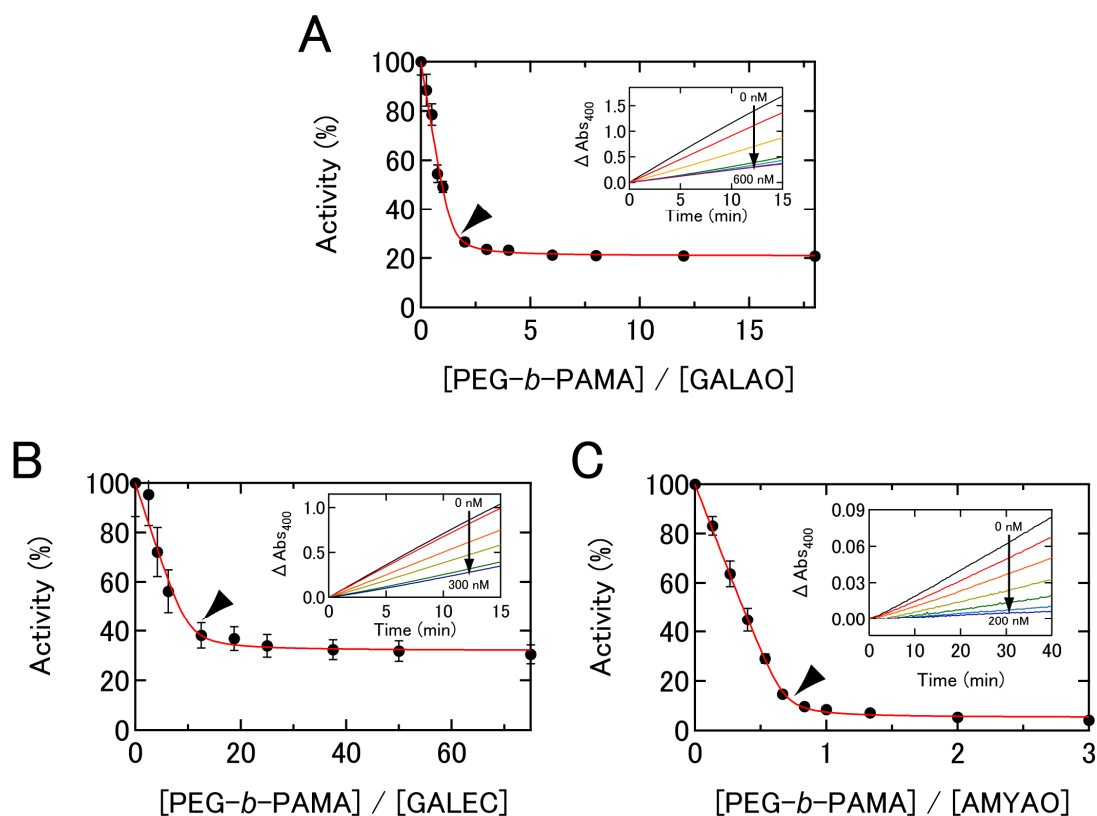

**Figure S2.** Changes in activity of GALAO, GALEC, or AMYAO. Titration of PEG-*b*-PAMA to 50 nM GALAO (A), 12 nM GALEC (B), and 150 nM AMYAO (C) in 10 mM MOPS (pH 7.0). The arrows indicate the mixing ratios used in Figure 2. The insets show the time course of increase in absorbance at 400 nm in the presence of various concentrations of PEG-*b*-PAMA.

**Table S1.** A matrix of final concentrations of analytes for discrimination study

|                 | ALB    | IMM    | ANT    | FIB    | TRA    |
|-----------------|--------|--------|--------|--------|--------|
| Analyte 1 (ALB) | 100 nM |        |        |        |        |
| Analyte 2 (IMM) |        | 100 nM |        |        |        |
| Analyte 3 (ANT) |        |        | 100 nM |        |        |
| Analyte 4 (FIB) |        |        |        | 100 nM |        |
| Analyte 5 (TRA) |        |        |        |        | 100 nM |
| Analyte 6 (A1)  | 25 nM  | 25 nM  | 25 nM  | 25 nM  |        |
| Analyte 7 (A2)  | 25 nM  | 25 nM  | 25 nM  |        | 25 nM  |

**Table S2.** Data set matrix of  $v/v_0$  for individual plasma protein analytes generated from the EPC sensor array (GALAO, GALEC, AMYLA, and AMYAN) against seven analytes

| Analytes | GALAO  | GALEC  | AMYLO  | AMYAN  |
|----------|--------|--------|--------|--------|
| ALB      | 1.4700 | 1.3639 | 1.1164 | 1.1080 |
| ALB      | 1.4475 | 1.0677 | 0.8660 | 0.9674 |
| ALB      | 1.3241 | 1.2873 | 0.9877 | 0.7534 |
| ALB      | 1.3259 | 1.2350 | 1.1133 | 1.0194 |
| ALB      | 1.3662 | 1.0667 | 0.9896 | 0.9853 |
| ALB      | 1.3093 | 1.0815 | 0.9027 | 1.0068 |
| ANT      | 2.3620 | 1.6894 | 4.1830 | 1.4528 |
| ANT      | 2.0487 | 1.4131 | 4.2640 | 1.2193 |
| ANT      | 2.0282 | 1.7930 | 4.6502 | 1.0013 |
| ANT      | 1.8238 | 1.6983 | 4.9104 | 1.2331 |
| ANT      | 1.7091 | 1.2517 | 4.4794 | 1.1634 |
| ANT      | 2.0877 | 1.4378 | 4.3724 | 1.1515 |
| FIB      | 2.2567 | 1.0244 | 2.6467 | 2.0255 |
| FIB      | 1.9766 | 0.8062 | 2.5891 | 1.4463 |
| FIB      | 1.9558 | 0.8794 | 3.0712 | 1.2857 |
| FIB      | 1.7528 | 0.9715 | 3.0513 | 1.4096 |
| FIB      | 1.6132 | 0.7026 | 2.8247 | 1.3339 |
| FIB      | 2.0339 | 0.7697 | 2.8245 | 1.2353 |
| IMM      | 0.8354 | 1.2424 | 1.1459 | 1.0838 |
| IMM      | 0.8852 | 1.4516 | 0.7296 | 1.0147 |
| IMM      | 0.9085 | 1.1011 | 0.7960 | 1.1349 |
| IMM      | 0.9009 | 1.0013 | 0.7833 | 1.0759 |
| IMM      | 0.8151 | 0.9994 | 0.8205 | 0.9102 |
| IMM      | 0.8798 | 0.9427 | 0.7971 | 0.9578 |
| TRA      | 1.0928 | 1.3676 | 0.9983 | 0.9892 |
| TRA      | 1.1246 | 1.0494 | 0.7108 | 0.9837 |
| TRA      | 1.0797 | 1.2485 | 0.8062 | 1.0409 |
| TRA      | 1.0808 | 1.1643 | 0.8149 | 1.0961 |
| TRA      | 0.9727 | 0.9857 | 0.8883 | 0.9182 |
| TRA      | 1.1032 | 1.0194 | 0.8045 | 1.0264 |
| A1       | 1.9761 | 1.3401 | 1.8887 | 0.9179 |
| A1       | 2.0324 | 1.0459 | 1.9587 | 1.1144 |
| A1       | 2.0177 | 1.2457 | 2.2866 | 1.0081 |
| A1       | 1.7680 | 1.2450 | 2.3677 | 1.1811 |
| A1       | 1.6653 | 0.9739 | 2.2893 | 1.0344 |
| A1       | 2.0064 | 1.0150 | 2.2317 | 1.0433 |
| A2       | 1.9463 | 1.7756 | 1.1841 | 1.0705 |
| A2       | 1.8993 | 1.3541 | 1.5385 | 0.9936 |
| A2       | 1.8494 | 1.8000 | 1.6240 | 0.9838 |
| A2       | 1.7543 | 1.6705 | 2.0183 | 1.1071 |
| A2       | 1.5952 | 1.1857 | 1.8339 | 1.0281 |
| A2       | 1.9291 | 1.3688 | 1.7789 | 1.1038 |

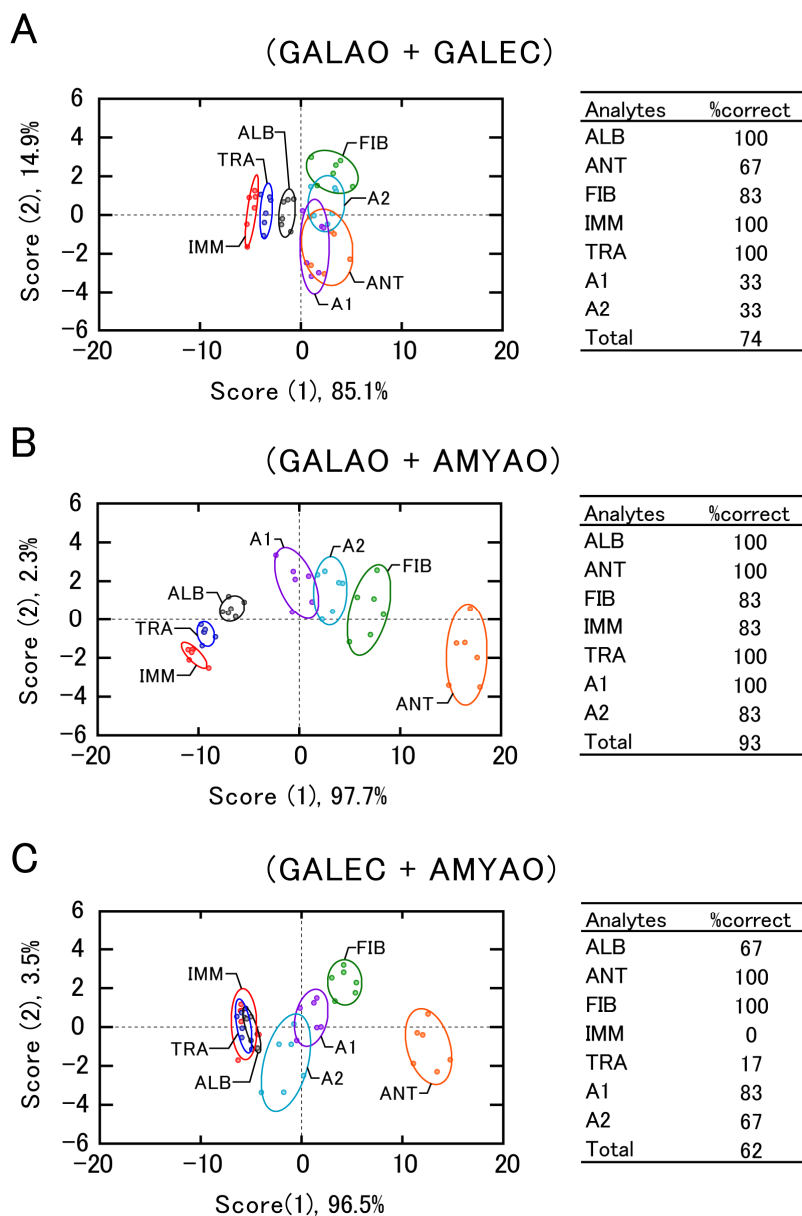

**Figure S3.** Classification accuracy of sensor arrays consisting of two EPCs for discrimination of seven analytes: (A) GALAO and GALEC, (B) GALAO and AMYAO, (C) GALEC and AMYAO. Two discriminant functions of enzyme activity patterns in discriminant score plots were obtained by linear discriminant analysis. The 95% confidence ellipses for the individual plasma protein analytes are shown. The values are taken from the jackknifed classification matrix based on the linear discriminant analysis model, i.e., Mahalanobis distances to the centroid of each group.

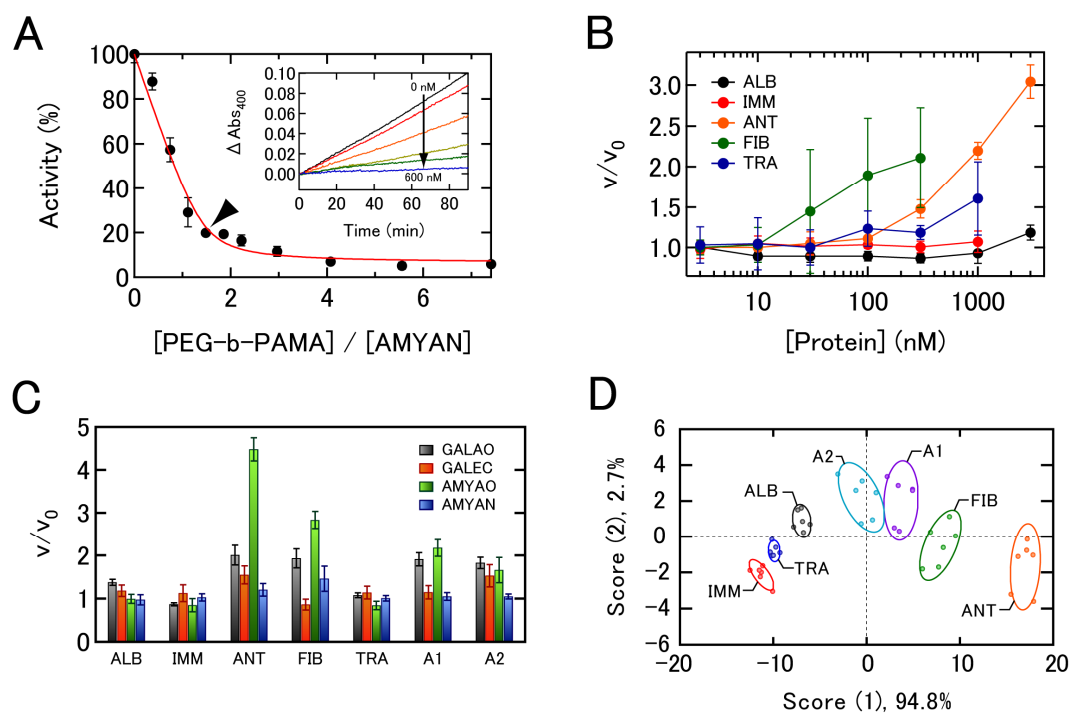

**Figure S4.** Pattern-based sensing of plasma protein analytes using four EPCs. (A) Titration of PEG-*b*-PAMA to 135 nM AMYAN in 10 mM MOPS (pH 7.0). The arrow indicates the mixing ratio used in (B). The inset shows the time course of increase in absorbance at 400 nm in the presence of various concentrations of PEG-*b*-PAMA. (B) Titration of five plasma proteins to the mixture of 135 nM AMYAN and 205.5 nM PEG-*b*-PAMA in 10 mM MOPS (pH 7.0). The y-axis indicates the ratio of velocity of absorbance increase before ( $v_0$ ) and after ( $v$ ) addition of plasma proteins. (C) Enzyme activity patterns for seven analytes obtained by four EPC (GALAO, GALEC, AMYAO, and AMYAN). Each value represents the average of six parallel measurements with standard deviation. (D) Discriminant score plot of the first two discriminant functions of enzyme activity patterns analyzed by linear discriminant analysis. The 95% confidence ellipses for the individual plasma protein analytes are shown.



**Table S3.** Discrimination of 21 unknown plasma protein analytes by the EPC sensor array

| Identification | Enzyme activity pattern |        |        | Verification | Accuracy |
|----------------|-------------------------|--------|--------|--------------|----------|
|                | GALAO                   | GALEC  | AMYAO  |              |          |
| ALB            | 1.3374                  | 1.3441 | 0.9953 | ALB          | YES      |
| ANT            | 1.7897                  | 1.7398 | 4.7284 | ANT          | YES      |
| FIB            | 1.6566                  | 0.7690 | 3.0940 | FIB          | YES      |
| IMM            | 0.9357                  | 1.1016 | 0.8873 | IMM          | YES      |
| TRA            | 1.0772                  | 0.9996 | 1.0140 | TRA          | YES      |
| A1             | 1.7535                  | 0.9977 | 2.6385 | A1           | YES      |
| A2             | 1.7275                  | 1.4708 | 2.0824 | A2           | YES      |
| ALB            | 1.2938                  | 1.0955 | 0.9767 | ALB          | YES      |
| ANT            | 1.8310                  | 1.5736 | 5.2256 | ANT          | YES      |
| FIB            | 1.7411                  | 0.6435 | 3.2949 | FIB          | YES      |
| IMM            | 0.8970                  | 1.1034 | 0.7850 | IMM          | YES      |
| TRA            | 1.0737                  | 0.9465 | 0.9286 | TRA          | YES      |
| A1             | 1.7866                  | 0.9013 | 2.8737 | FIB          | NO       |
| A2             | 1.7482                  | 1.4772 | 1.9503 | A2           | YES      |
| ALB            | 1.3077                  | 1.1028 | 1.0279 | ALB          | YES      |
| ANT            | 1.8336                  | 1.5175 | 4.8239 | ANT          | YES      |
| FIB            | 1.8206                  | 1.0555 | 3.2787 | FIB          | YES      |
| IMM            | 0.9101                  | 1.0202 | 0.9183 | IMM          | YES      |
| TRA            | 1.0583                  | 1.1062 | 0.8873 | TRA          | YES      |
| A1             | 1.7988                  | 1.1880 | 2.4099 | A1           | YES      |
| A2             | 1.7288                  | 1.5054 | 1.6254 | A2           | YES      |

### References

- [1] Pace, C.N.; Vajdos, F.; Fee, L.; Grimsley, G.; Gray, T., *Protein Sci.* **1995**, 4, 24
- [2] Lienqueo, M.E.; Mahn, A.; Asenjo, J.A., *J. Chromatogr. A*, **2002**, 978, 71.
- [3] Fraczkiewicz, R.; Braun, W., *J. Comput. Chem.*, **1998**, 19, 319.
